# Supplementary material for: High-Resolution Proteomics of Aedes Aegypti Salivary Glands Infected With DENV2, ZIKV and CHIKV Reveal Virus-Specific and Broad Antiviral Factors
Source: Research Square preprint supplement (doi:10.21203/rs.3.rs-830517/v1), 2021-08-24
Supplement: Supplementary file 1 [file 2ed5967b3acca3f46049a10e.xlsx]

## Sheet: Sheet1
Supplemental table 2: Differentially expressed proteins (DEPs) in A. Aegypti SGs in response to DENV2, ZIKV and CHIKV infection
Gene Accession No.	Gene Name/ Description	Peptides(95%)	Percentage coverage (95)	DENV2 Fold change	p-value	ZIKV Fold change	p-value	CHIKV Fold change	p-value	Signal P	Functional annotation
AAEL019996	SGBAP|salivary gland broad spectrum antiviral protein | Uncharacterized|protein_coding|supercont1.92:2359377:2359880:1|gene:AAEL003584	4	25.2	3.92527	0.0381333	1.64915	0.03925	2.76667	0.0124494	Y	UNK
AAEL012860	Uncharecterized |protein_coding|supercont1.752:227878:246766:-1|gene:AAEL012860	4	24	3.14637	0.0341					N	UNK
AAEL009993	SGS1| salivary gland surface protein 1|protein_coding|supercont1.445:462217:472311:-1|gene:AAEL009993	100	27.7	2.02317	0	1.7684	0.00055	3.1224	9.3321e-05	N	UNK
AAEL006406	14.5KDa secreted protein|protein_coding|supercont1.204:283157:286136:1|gene:AAEL006406	17	32.4	0.556067	0.0212			0.164989	0.029527	Y	UNK
AAEL003053	Allergen, putative|protein_coding|supercont1.76:1230328:1231673:1|gene:AAEL003053	5	19.2	0.528467	0.0407333	0.35705	0.0433			Y	UNK
AAEL003107	Uncharecterized |protein_coding|supercont1.77:425430:431539:1|gene:AAEL003107	4	14.3	0.4519	0.0381					Y	UNK
AAEL003600	34kDa Secreted peptide|protein_coding|supercont1.92:2370127:2371065:1|gene:AAEL003600	54	45.5	0.391733	0.00563333			0.301784	9.8364e-06	Y	UNK
AAEL009852	Uncharecterized|protein_coding|supercont1.432:687355:687803:1|gene:AAEL009852	41	79.8			3.6587	0.0371			N	UNK
AAEL000793	Venom allergen 3|protein_coding|supercont1.16:3232231:3233119:-1|gene:AAEL000793	26	49.8			0.23265	0.03405			Y	UNK
AAEL010235	30 kDa salivary gland allergen Aed a 3 Precursor (Allergen Aed a 3)|protein_coding|supercont1.464:161472:162363:1|gene:AAEL010235	46	30.8					0.273645	0.0143545	Y	UNK
AAEL003601	Uncharecterized|protein_coding|supercont1.92:2373093:2374043:1|gene:AAEL003601	32	42.7					0.494051	0.0140977	Y	UNK
AAEL010242	8.7kDa secreted protein|protein_coding|supercont1.464:147144:147458:1|gene:AAEL010242	23	43.4					0.2409	0.0178946	Y	UNK
AAEL008305	Putative 7.8 kDa acidic protein |protein_coding|supercont1.313:328066:328412:-1|gene:AAEL008305	19	47.4					0.402077	0.0292077	Y	UNK
AAEL007986	Uncharecterized |protein_coding|supercont1.293:1185288:1185794:1|gene:AAEL007986	12	38.7					0.485578	0.000163813	Y	UNK
AAEL004873	GILT-like protein |protein_coding|supercont1.133:1056525:1072136:-1|gene:AAEL004873	9	30.8	2.20927	0.0248133	4.67365	0.03355	1.72193	0.0227283	Y	UNK
AAEL003057	Venom allergen 5, putative|protein_coding|supercont1.76:1255699:1256752:-1|gene:AAEL003057	2	10	0.5031	0.0353333	0.374	0.04905			Y	UNK
AAEL029057	Uncharecterized|protein_coding|supercont1.445:483273:501887:1|gene:AAEL009992	122	30.2	1.97527	0.0129333	2.27865	0.0005			N	UNK
AAEL008192	RpS3: 40S ribosomal protein S3|protein_coding|supercont1.305:1304669:1321925:-1|gene:AAEL008192	2	11.7	0.301267	0.0414					N	RTT
AAEL015006	60S ribosomal protein L23 (L17A)(AeRpL17A)|protein_coding|JXUM01S005463:6111:14807:1|gene:AAEL015006	2	19.6	0.270533	0.0417					N	RTT
AAEL004855	ADP,ATP carrier protein|protein_coding|supercont1.132:1668937:1682495:1|gene:AAEL004855	6	14.9	1.8465	0.04182	1.60195	0.0433			N	RSM
AAEL002501	Protein disulfide isomerase|protein_coding|supercont1.59:950939:959328:-1|gene:AAEL002501	2	4.8	2.12933	0.0378333	1.7457	0.0206			Y	RSM
AAEL002886	Thioredoxin reductase|protein_coding|JXUM01S002105:4382:14174:-1 | gene AAEL002886	3	8	1.6832	0.0373333			2.11039	0.0439048	N	RSM
AAEL010697	3-ketoacyl-coa thiolase, mitochondrial (beta- ketothiolase) (acetyl-coa acyltransferase) (mitochondrial 3-oxoacyl- coa thiolase)|protein_coding|JXUM01S001340:170761:177603:1|gene:AAEL010697	3	13.1	1.63547	0.0343			2.53705	0.0210519	N	RSM
AAEL000641	Protein disulfide isomerase|protein_coding|supercont1.13:668270:683719:-1|gene:AAEL000641	16	33.4	0.609767	0.038					Y	RSM
AAEL004423	Mitochondrial F0 ATP synthase D chain, putative|protein_coding|supercont1.119:445195:452931:-1|gene:AAEL004423	4	29.1	0.411967	0.0272					N	RSM
AAEL004457	Putative cytochrome c|protein_coding|JXUM01S004549:131031:131357:1|gene:AAEL004457	2	13.9	0.0895	0.0386667					N	RSM
AAEL002813	Coupling factor, putative|protein_coding|supercont1.68:1541837:1563004:1|gene:AAEL002813	2	27.4			1.7877	0.03445			N	RSM
AAEL004112	TPX2: Thioredoxin Peroxidase.|protein_coding|supercont1.107:2094566:2095144:-1|gene:AAEL004112	5	64.78					2.8607	0.0360648	N	RSM
AAEL002870	Dipeptidyl peptidase iii|protein_coding|supercont1.70:2306870:2312416:-1|gene:AAEL002870	5	8.2	3.2984	0.0309333					N	PROT
AAEL010912	Dipeptidyl-peptidase|protein_coding|supercont1.519:212381:218433:1|gene:AAEL010912	4	5.8	1.76043	0.0415					N	PROT
AAEL012994	Glucose-6-phosphate isomerase|protein_coding|supercont1.772:293892:315118:1|gene:AAEL012994	5	8.9	5.28723	0.0377333					N	MET
AAEL016984	Glyceraldehyde-3-phosphate dehydrogenase|protein_coding|supercont1.157:405434:406432:-1|gene:AAEL016984	11	34.9	5.16527	0.0137			7.78876	0.0127339	N	MET
AAEL024228	Enolase|protein_coding|supercont1.38:1462458:1464130:1|gene:AAEL001668	19	37.6	4.30217	0.00833333					N	MET
AAEL009185	Arginine or creatine kinase|protein_coding|supercont1.377:1030526:1046490:1|gene:AAEL009185	10	38.9	3.94443	0.01957			4.62441	0.00767334	N	MET
AAEL002542	Tpi: triosephosphate isomerase|protein_coding|supercont1.60:534041:534939:1|gene:AAEL002542	6	30.8	3.88363	0.0419333					N	MET
AAEL004988	Pgk: phosphoglycerate kinase|protein_coding|supercont1.137:1202078:1205314:1|gene:AAEL004988	8	23.9	3.1782	0.0231667					N	MET
AAEL005766	Fructose-bisphosphate aldolase|protein_coding|supercont1.174:169509:197538:-1|gene:AAEL005766	9	30	3.05687	0.0377333					N	MET
AAEL014913	Pyruvate kinase|protein_coding|supercont1.1334:9859:21417:1|gene:AAEL014913	9	24.4	2.70143	0.02521			5.57361	0.00281174	N	MET
AAEL009691	Pyruvate carboxylase|protein_coding|JXUM01S001363:53354:62482:1|gene:AALF004388	4	6.5	2.6204	0.03095					N	MET
AAEL012897	Aconitase, mitochondrial|protein_coding|supercont1.756:369906:385817:1|gene:AAEL012897	5	7.5	2.46663	0.0324333					N	MET
AAEL002399	Aspartate aminotransferase|protein_coding|supercont1.55:1678877:1701605:-1|gene:AAEL002399	5	13.5	2.44303	0.0295					N	MET
AAEL007707	Malate dehydrogenase|protein_coding|supercont1.275:935176:952474:-1|gene:AAEL007707	4	21	2.4244	0.0258667					N	MET
AAEL004088	Aldo-keto reductase|protein_coding|supercont1.107:2167816:2174044:1|gene:AAEL004088	4	17.6	2.14473	0.0307667					N	MET
AAEL003046	Saposin|protein_coding|supercont1.75:2539958:2582225:-1|gene:AAEL003046	8	7.2	0.5258	0.0326667					N	MET
AAEL005422	Pyrroline-5-carboxylate dehydrogenase|protein_coding|supercont1.155:1663653:1700496:-1|gene:AAEL005422	5	13			0.57675	0.0237			N	MET
AAEL008166	Malate dehydrogenase|protein_coding|supercont1.304:1072918:1089871:-1|gene:AAEL008166	18	53.9					2.61496	0.0124354	N	MET
AAEL007420	SRPN25: Serine Protease Inhibitor (serpin) homologue - unlikely to be inhibitory|protein_coding|supercont1.255:1148690:1150060:1|gene:AAEL007420	20	32.1	2.50423	0.0195233			2.05072	0.0338639	Y	IMM
AAEL003182	SRPN26: Serine Protease Inhibitor (serpin) homologue - unlikely to be inhibitory.|protein_coding|supercont1.81:289404:290790:-1|gene:AAEL003182	20	33.7	2.4552	0.0205667					Y	IMM
AAEL000533	CTL16: C-Type Lectin (CTL16)|protein_coding|supercont1.10:2735183:2735704:1|gene:AAEL000533	25	47.4	0.494533	0.0197	2.1268	0.01745			Y	IMM
AAEL002704	SRPN23: Serine Protease Inhibitor (serpin) homologue|protein_coding|supercont1.65:1197986:1199365:-1|gene:AAEL002704	52	40.8	0.417167	0.0198333	0.47355	0.0152	2.45985	0.0127559	Y	IMM
AAEL000556	CTL25: C-Type Lectin (CTL25)|protein_coding|supercont1.10:2723540:2724054:-1|gene:AAEL000556	13	51	0.3966	0.0439667	1.5161	0.0435	0.439819	0.010594	Y	IMM
AAEL009670	LYSP: C-Type Lysozyme (Lys-P).|protein_coding|supercont1.417:946162:946657:1|gene:AAEL009670	4	27.8	0.304	0.0436667	0.56015	0.03605			Y	IMM
AAEL000726	Fibrinogen related protein 20|protein_coding|supercont1.15:2838199:2839199:1|gene:AAEL000726	50	53.3	0.236767	0.000166667	0.417	0.02995			Y	IMM
AAEL000749	Fibrinogen related protein 22|protein_coding|supercont1.15:2852946:2853941:1|gene:AAEL000749	53	74.1	0.169233	6.66667e-05					Y	IMM
AAEL011408	CTL21: C-Type Lectin (CTL21)|protein_coding|supercont1.577:374366:374905:-1|gene:AAEL011408	2	5.7			1.6795	0.0436			Y	IMM
AAEL005417	Annexin x|protein_coding|supercont1.155:618843:628484:1|gene:AAEL005407	2	15.6	7.44723	0.0296667	4.6944	0.04068			N	DIV
AAEL006485	Inosine-uridine preferring nucleoside hydrolase|protein_coding|supercont1.208:816972:818047:-1|gene:AAEL006485	24	37.9	5.8114	0.00196667					N	DIV
AAEL008844	Calcium-binding protein, putative|protein_coding|supercont1.352:502796:559774:1|gene:AAEL008844	2	8.4	3.1862	0.0305667	3.6386	0.0242			N	DIV
AAEL003193	Inorganic pyrophosphatase|protein_coding|JXUM01S001217:291297:306032:1|gene:AAEL003193	3	6.2	2.5461	0.02268					N	DIV
AAEL000795	Ubiquitin |protein_coding|JXUM01S004958:117162:118763:1|gene:AAEL000795	4	52.5	1.57913	0.0416					N	DIV
AAEL001005	Calreticulin|protein_coding|supercont1.20:3615914:3622930:-1|gene:AAEL001005	33	42.3	0.272367	0.0265	2.09495	0.0434			Y	DIV
AAEL006511	Ubiquitin|protein_coding|SuperContig supercont1.209: 1,409,933-1,410,803 forward strand	5	35.9					0.28886	0.0286104	N	DIV
AAEL006719	AMY1: Alpha-amylase I Precursor (EC 3.2.1.1)(1,4-alpha-D-glucan glucanohydrolase)|protein_coding|supercont1.219:415411:417683:-1|gene:AAEL006719	3	5			0.6049	0.04375			Y	DIG
AAEL005656	Myosin heavy chain, nonmuscle or smooth muscle|protein_coding|supercont1.168:1186737:1238994:-1|gene:AAEL005656	15	10.1	3.23477	0.0117	1.73445	0.0131			N	CS
AAEL007915	Moesin/ezrin/radixin homolog 1|protein_coding|supercont1.288:60426:136590:1|gene:AAEL007915	5	9.3	0.55	0.0264333					N	CS
AAEL006096	Gelsolin precursor|protein_coding|supercont1.189:2000883:2002111:1|gene:AAEL006096	22	49.1	0.5431	0.0282333	0.52015	0.02625			Y	CS
AAEL002759	Tropomyosin invertebrate|protein_coding|JXUM01S000870:19657:31145:1|gene:AALF026319	4	15.1	0.495133	0.0237					N	CS
AAEL013229	Tubulin alpha chain|protein_coding|SuperContig supercont1.215: 571,537-574,025	10	49.8					3.18111	0.0235347	N	CS
AAEL005672	ADA| Adenosine deaminase|protein_coding|supercont1.169:649555:651184:-1|gene:AAEL005676	58	54.8	5.0644	0.0013	1.4967	0.04415	3.33001	0.000978133	Y	BF
AAEL006347	APY: Apyrase Precursor (EC 3.6.1.5)(Adenosine diphosphatase)(ATP-diphosphohydrolase)(ATP-diphosphatase)(ADPase)(Allergen Aed a 1)|protein_coding|supercont1.201:1129123:1131245:-1|gene:AAEL006347	74	54.8	4.10777	0.00323333			3.81232	0.00013006	Y	BF
AAEL006333	Salivary apyrase, putative|protein_coding|supercont1.201:221091:222943:1|gene:AAEL006333	16	23.6	2.33933	0.0201433			2.50372	0.00463858	Y	BF
AAEL007394	Putative d7 short|protein_coding|supercont1.253:1259805:1260348:1|gene:AAEL007394	5	24.8	0.568767	0.0341			0.0559892	0.0164584	Y	BF
AAEL006424	D7 long : 37 kDa salivary gland allergen Aed a 2 Precursor (Protein D7)(Allergen Aed a 2)|protein_coding|supercont1.204:345910:347111:-1|gene:AAEL006424	125	69.2	0.330067	0.0175	1.7115	0.0298	0.418993	0.000107155	Y	BF
AAEL000229	Prosialokinin precursor|protein_coding|supercont1.4:2317250:2318399:-1|gene:AAEL000229	17	57.7			0.57675	0.0237	0.2404	0.0101126	Y	BF
AAEL006417	D7 long, putative|protein_coding|supercont1.204:322860:324089:1|gene:AAEL006417	77	59.6					0.392152	0.000170703	Y	BF
